# Supplementary material for: Glycosylphosphatidylinositol Biosynthesis and Remodeling are Required for Neural Crest Cell, Cardiac and Neural Development
Source: bioRxiv or medRxiv preprint supplement (doi:10.1101/513507), 2019-01-07
Supplement: Supplementary file [file media-2.pdf]

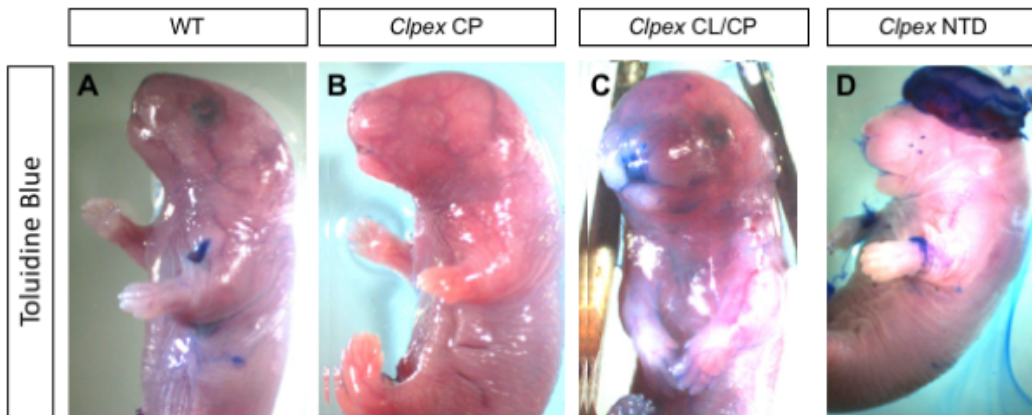

**Supplementary Figure 2. *Clpex* mutants do not display a defect in barrier formation.** E18.5 WT (A), *Clpex* cleft palate mutant (B), *Clpex* cleft lip/cleft palate mutant (C), and *Clpex* neural tube defect mutant (D) stained with Toluidine Blue.
