# Supplementary material for: Glycosylphosphatidylinositol Biosynthesis and Remodeling are Required for Neural Crest Cell, Cardiac and Neural Development
Source: bioRxiv or medRxiv preprint supplement (doi:10.1101/513507), 2019-01-07
Supplement: Supplementary file [file media-3.pdf]

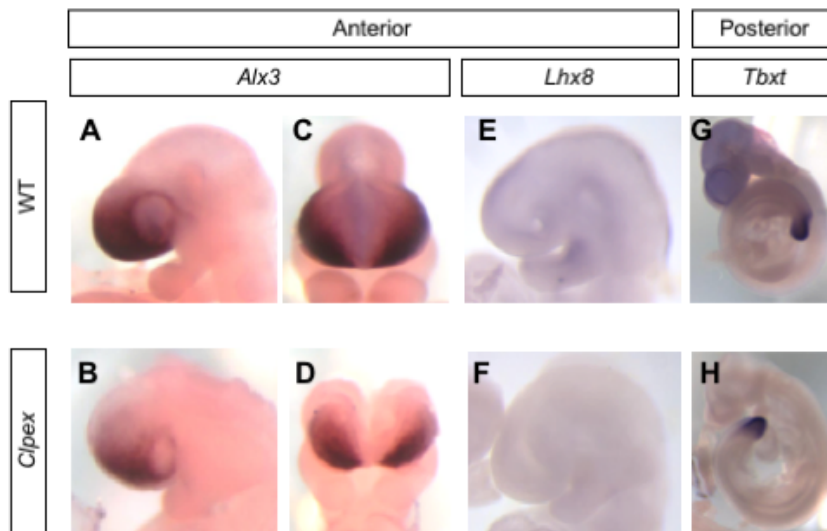

**Supplementary Figure 3. *Clpex* mutants display defects in expression of anterior/posterior patterning genes.** E9.5 WT (A,C) and *Clpex* mutant (B, D) WMISH with  $\alpha$ *Alx3* probe, an anterior patterning gene. E9.5 WT (E) and *Clpex* mutant (F) WMISH with  $\alpha$ *Lhx8* probe, an anterior patterning gene. E9.5 WT (G) and *Clpex* mutant (H) WMISH with  $\alpha$ *Tbxt* (*Brachyury*) probe, a posterior patterning gene.
